# Supplementary material for: Non-thalamic origin of zebrafish sensory nuclei implies convergent evolution of visual pathways in amniotes and teleosts
Source: eLife. 2020 Sep 8;9:e54945. doi: 10.7554/eLife.54945 (PMC7478893; doi:10.7554/eLife.54945)
Supplement: Supplementary file 1. — A summary table showing experimental conditions of tamoxifen treatments in two quadruple transgenic lines: Tg(her5:ERT2CreERT2;βactin:lox-stop-lox-hmgb1-mCherry;279A-GFP) and Tg(Dr830:ERT2CreERT2;βactin:lox-stop-lox-hmgb1-mCherry;279A-GFP). For the latter transgenic line, the conditions were adapted depending on the developmental stages. [file elife-54945-supp1.xlsx]

## Sheet: Feuil1
			Supplementary file 1. Conditions of tamoxifen treatments
			age			tamoxifen treatment			tamoxifen	age of	# fish
			start	end		duration	number	total	concentration	analysis	analyzed
						per day	of days	duration
			Tg(her5:ERT2CreERT2;βact:lox-stop-lox-hmgb1-mCherry;279A-GFP)
			24 hpf	30 hpf		6 h	1	6 h	10 µg/mL	3 mpf	14
			Tg(Dr830:ERT2CreERT2;βact:lox-stop-lox-hmgb1-mCherry;279A-GFP)
			24 hpf	30 hpf		6 h	1	6 h	10 µg/mL	3 mpf	3
			24 hpf	30 hpf		6 h	1	6 h	10 µg/mL	6 mpf	6
			30 hpf	54 hpf		24 h	1	24 h	5 µg/mL	3 mpf	6
			48 hpf	54 hpf		6 h	1	6 h	10 µg/mL	3 mpf	6
			3 dpf	4 dpf		24 h	1	24 h	5 µg/mL	3 mpf	6
			7 dpf	9 dpf		4 h	2	8 h	5 µg/mL	3 mpf	6
			2 wpf	2 wpf		2 h	4	8 h	2 µg/mL	3 mpf	6
			3 wpf	3 wpf		2 h	4	8 h	2 µg/mL	3 mpf	6
			4 wpf	4 wpf		2 h	4	8 h	2 µg/mL	3 mpf	6
			5 wpf	5 wpf		2 h	4	8 h	2 µg/mL	3 mpf	6
			6 wpf	6 wpf		4 h	4	16 h	2 µg/mL	3 mpf	6
			8 wpf	8 wpf		4 h	4	16 h	2 µg/mL	3 mpf	6
